# Supplementary material for: Critical evaluation of SCGD-OES analytical performance in the presence of NaCl
Source: Royal Society of Chemistry journal article supplement (doi:10.1039/d1ja00439e), 2022-01-01
Supplement: d1ja00439e1.pdf [file d1ja00439e1.pdf]

# Supplemental Material

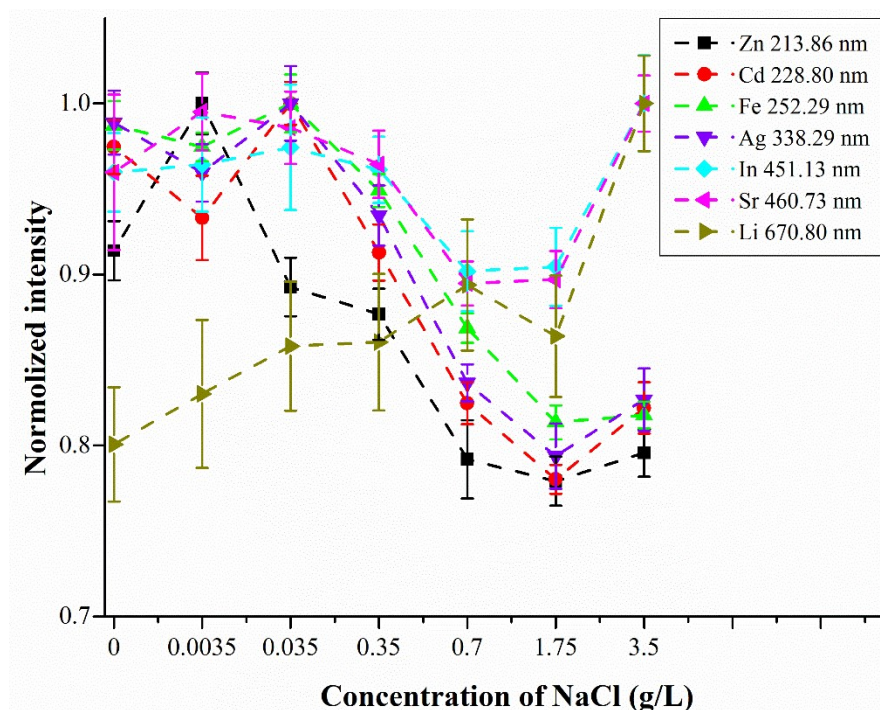

**Fig S1.** Background emission signals at analyte emission lines at increasing NaCl concentrations, normalized with the maximum value of each series. The integration range of each analyte is as following: Zn: 213.76-213.98 nm; Cd: 228.77-228.88 nm; Fe: 252.23-252.37 nm; Ag: 338.21-338.36 nm; In: 451.07-451.18 nm; Sr: 460.70-460.80 nm; Li: 670.94-671.13 nm. Please note that x-axis is not linear.

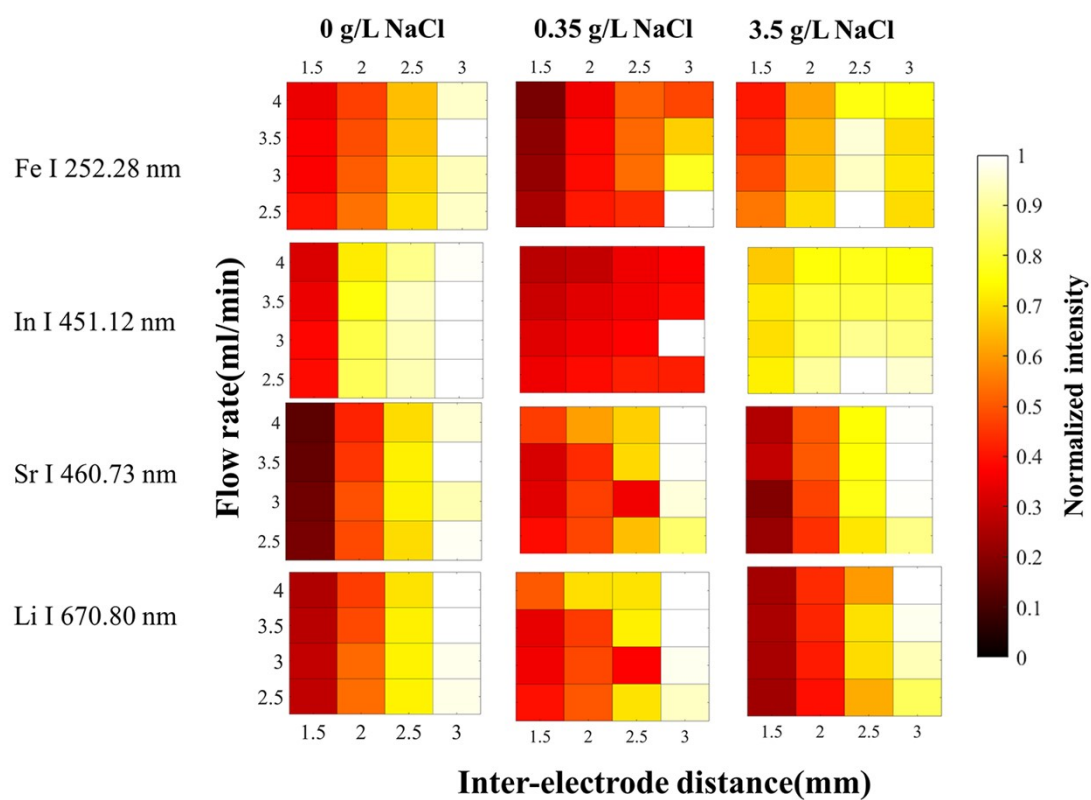

**Fig.S2.** Relative analyte emission signals of each element measured at different electrode gap distances and flow rates at different NaCl concentrations. NaCl concentration for each element from left to right are 0 g/L, 0.35 g/L and 3.5 g/L

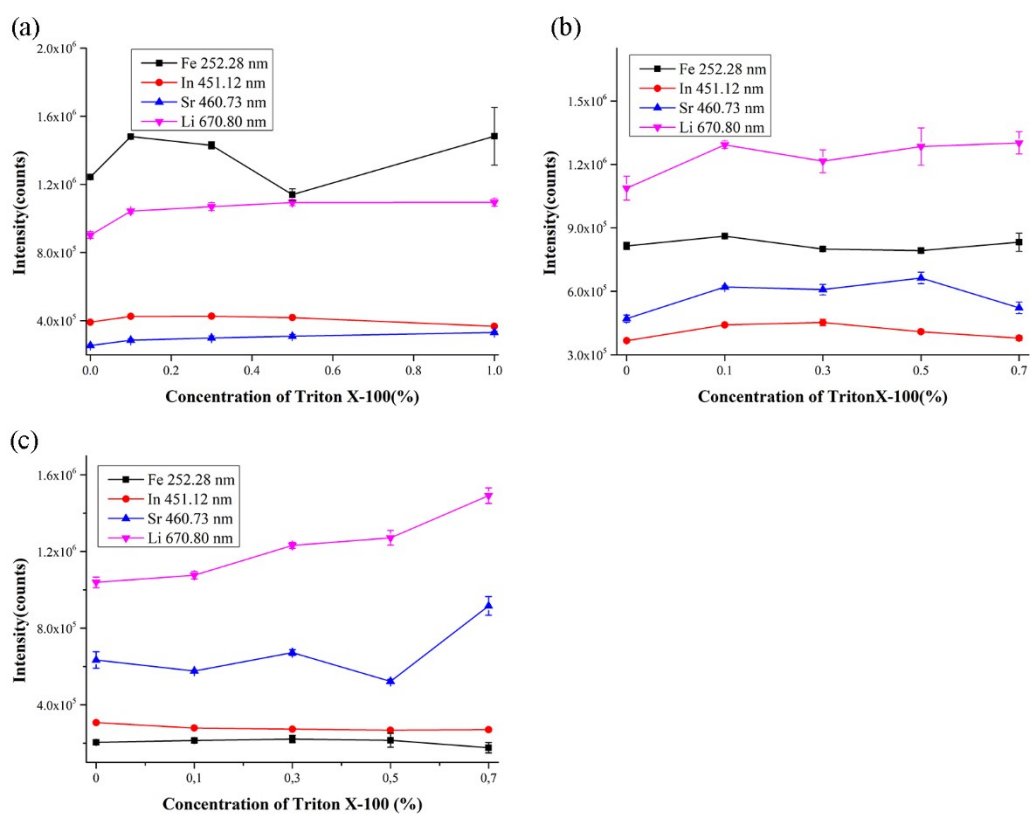

**Fig S3.** The influence of Triton X-100 on analytes emission signals under different salinities (a) 0 g/L NaCl; (b) 0.35 g/L NaCl; (c) 3.5 g/L NaCl.
